# Supplementary material
Source: publisher figshare collection journal article supplement (https://gsajournals.figshare.com/articles/dataset/_/7685642)
Supplement: Supplementary file 1 [file 3]

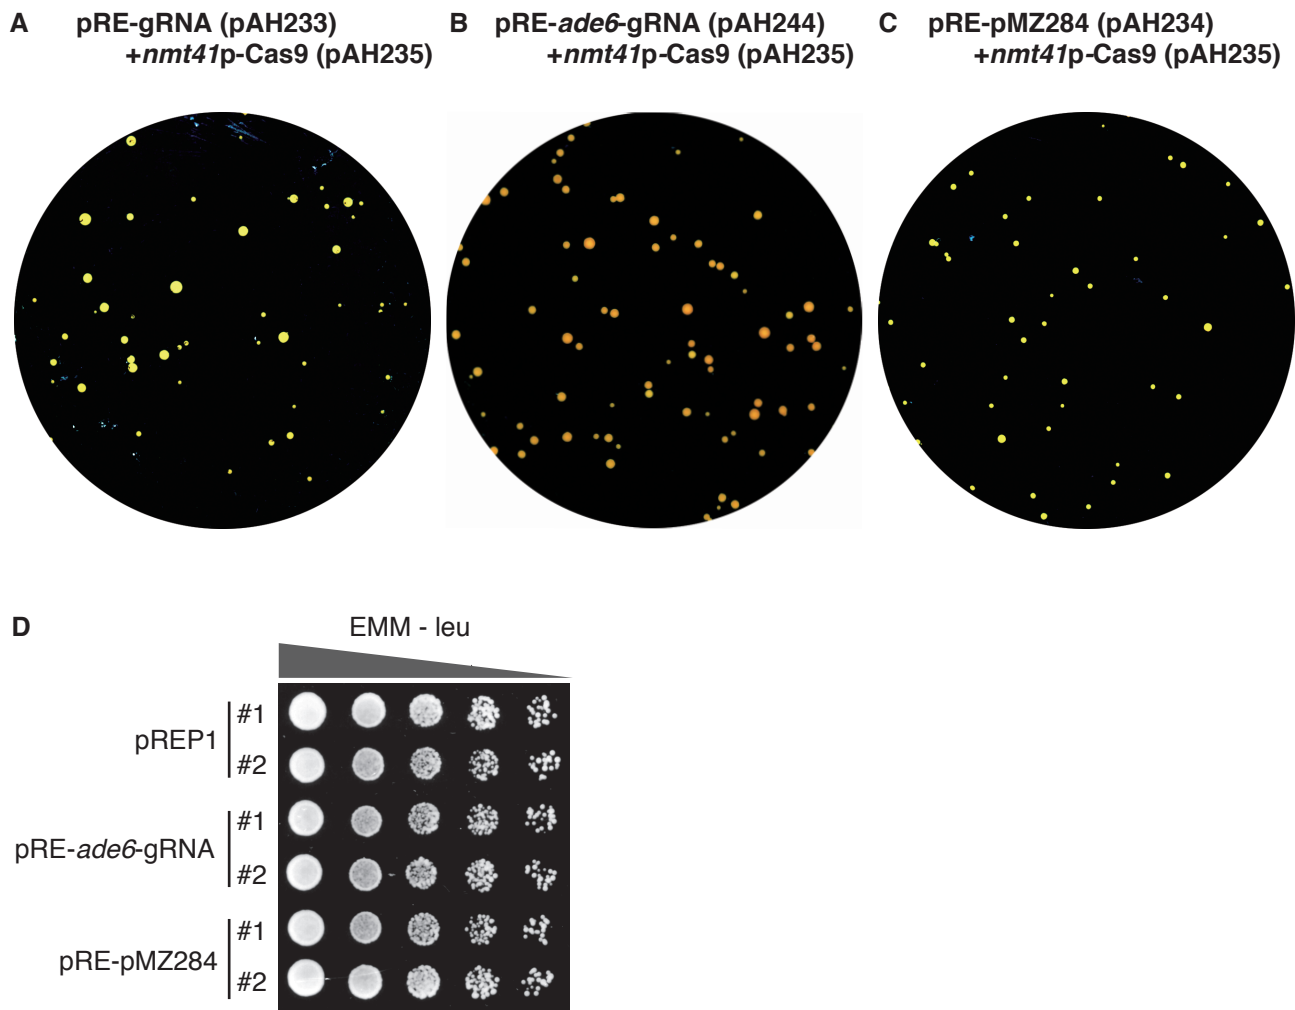

**Figure S2. Comparison of the growth of transformants expressing the *ade6* gRNA-Cas9 protein.**

- A. Transformants carrying pAH235 and pAH233 expressing no target gRNA (negative control).
- B. Transformants carrying pAH235 and pAH244 expressing the *ade6* gRNA.
- C. Transformants carrying pAH235 and pAH234 (pRE-pMZ284) expressing the *ade6* gRNA by a gRNA expression system previously reported (Jacobs *et al.* 2014).
- D. Comparison of the growth of transformants expressing *ade6* gRNA. The cell growth was evaluated by spotting assay.
