# Supplementary material
Source: publisher figshare collection journal article supplement (https://gsajournals.figshare.com/articles/dataset/_/7685642)
Supplement: Supplementary file 2 [file 3]

**Table S3. Oligonucleotides used in this study**

| <b>Number</b> | <b>Name</b>          | <b>Sequence (5'-3')</b>                        | <b>Description</b>                |
|---------------|----------------------|------------------------------------------------|-----------------------------------|
| KT1910        | PstI-rrk1-Fw         | GACAAGCTTGCATGCCTGCAGGGAAATCATAACATAGTATAATAGG | gRNA expression plasmid           |
| KT1903        | rrk1-pro-Rv          | CCAACTACCACCAACATAAGCAAA                       | gRNA expression plasmid           |
| KT1904        | rrk1-pro-gRNA-Fw     | TTTGCTTATGTTGGTGGTAGTTGG                       | gRNA expression plasmid           |
| KT1906        | gRNA-HHM-Rv          | CCTGTTTCGTCCTCACGGACTCAT                       | gRNA expression plasmid           |
| KT1907        | rrk1-ter-Fw          | ACCGAGTCGGTGGTGCTACGGTTATTTGTTAGCAATGGTA       | gRNA expression plasmid           |
| KT1913        | SacI-rrk1-ter-Rv     | TTAGACTCGAATTCGCGTCCTGGCAGCAAATACGGAAAC        | gRNA expression plasmid           |
| KT1928        | LEU2-BbsI-Fw         | GACACCATCACCATCATCTTCCTTTCTCTTACCAAAG          | gRNA expression plasmid           |
| KT1929        | LEU2-BbsI-Rv         | CTTTGGTAAGAGAAAGGAAGATGATGGTGATGGTGTC          | gRNA expression plasmid           |
| KT1932        | Bbs I-Inv-Fw         | GAGAAGACCTGTTTTAGAGCTAGAAATAGCAAGTT            | gRNA expression plasmid           |
| KT1933        | BbsI-Inv-Rv          | GAAGACCCGGTGTCTTCGGTACAGGTTATGTTTTTTG          | gRNA expression plasmid           |
| KT1911        | XhoI-Cas9-Fw         | CTTTGTAAATCTCGAATGGACTATAAGGACCACGACGG         | Cas9 expression plasmid           |
| KT1912        | BglII-Cas9-Rv2       | CTTTTACCCGGGAGATCTTACTTTTTCTTT TTTGCCTGGCCGG   | Cas9 expression plasmid           |
| KT2051        | NcoI-nmt41-Cas9-Fw   | ATAGTTATTTCCATGGTCGCCATAAAAGACAGAATAAGTC       | gRNA-Cas9 expression plasmid      |
| KT2052        | NcoI-Cas9-ter-Rv     | AAAATTGTGCCCATGGCATTACTAATAGAAAGGATTATT        | gRNA-Cas9 expression plasmid      |
| KT2087        | nmt1-quick-Fw        | GTTAATCGAAACATTGAAGATATATAAAGGAAGAGGAATC       | gRNA-Cas9 expression plasmid      |
| KT2088        | nmt1-quick-Rv        | GATTCCTCTTCCTTTATATATCTTCAATGTTTCGATTAAC       | gRNA-Cas9 expression plasmid      |
| KT1975        | ura4-quick-Fw        | CTTTTGGCTGAAATGTCATCCAAAGGCTCTTTGGC            | gRNA-Cas9 expression plasmid      |
| KT1976        | ura4-quick-Rv        | GCCAAAGAGCCTTTGGATGACATTTTCAGCCAAAAG           | gRNA-Cas9 expression plasmid      |
| KT1973        | MluI-gRNAcassette-Fw | TCTTTGTAAAACGCGGGGAAATCATAACATAGTATAATAG       | gRNA-Cas9 expression plasmid      |
| KT1974        | MluI-gRNAcassette-Rv | CTTCTTGCAAACGCGCGTCCTGGCAGCAAATACGGAAACC       | gRNA-Cas9 expression plasmid      |
| KT1934        | ade6-BbsI-gRNA-Fw    | CACCTCTATTGTTTCAGATGCCTCG                      | ade6 gRNA expression plasmid      |
| KT1946        | ade6-BbsI gRNA-Rv    | AAACCGAGGCATCTGAACAATAGA                       | ade6 gRNA expression plasmid      |
| KT1936        | ade6-check-Fw        | CAAAGATCCTGTCTGAATCACCTG                       | ade6 amplification for colony PCR |

|        |                       |                                                                                                         |                                   |
|--------|-----------------------|---------------------------------------------------------------------------------------------------------|-----------------------------------|
| KT1937 | ade6-check-Rv         | CAGTTATGTCTATGGTCGCCTATG                                                                                | ade6 amplification for colony PCR |
| KT1966 | swi6-gDNA-Fw2         | CACCGCTATGAATACCTTTTGAAA                                                                                | swi6 gRNA expression plasmid      |
| KT1967 | swi6-gDNA-Rv2         | AAACTTTCAAAAGGTATTCATAGC                                                                                | swi6 gRNA expression plasmid      |
| KT1987 | swi6-gRNA-Fw5         | CACCAGTTCAGAAGCCGATTGTAG                                                                                | swi6 gRNA expression plasmid      |
| KT1988 | swi6-gRNA-Rv5         | AAACCTACAATCGGCTTCTGAACT                                                                                | swi6 gRNA expression plasmid      |
| KT1023 | swi6-W104A-Fw         | GAATACCTTTTGAAAGCGGAAGGTTATGACG                                                                         | swi6 mutagenesis oligomer         |
| KT1024 | swi6-W104A-Rv         | CGTCATAACCTTCCGCTTTCAAAAGGTATTC                                                                         | swi6 mutagenesis oligomer         |
| KT1959 | swi6-W104A-donor-Fw   | GCTATGAATACCTTTTGAAAGCGGAAGGTTATGACGATCCCAG                                                             | swi6 mutagenesis oligomer         |
| KT1960 | swi6-W104A-donor-Rv   | CTGGGATCGTCATAACCTTCCGCTTTCAAAAGGTATTCATAGC                                                             | swi6 mutagenesis oligomer         |
| KT2089 | swi6-W104A-donor25-Fw | GGAGGCTATGAATACCTTTTGAAAGCGGAAGGTTATGACGATCCCAGTG                                                       | swi6 mutagenesis oligomer         |
| KT2090 | swi6-W104A-donor25-Rv | CACTGGGATCGTCATAACCTTCCGCTTTCAAAAGGTATTCATAGCCTCC                                                       | swi6 mutagenesis oligomer         |
| KT1957 | swi6-W104-arm-Fw      | CGACGATTGGAACAGAGTTAC                                                                                   | swi6 homology arm amplification   |
| KT1958 | swi6-W104-arm-Rv      | CAGATTCAATGTGACCATTCGGC                                                                                 | swi6 homology arm amplification   |
| KT2170 | mrc1-gRNA-Fw          | CACCATTGTGAGTTGAGAAGCGCT                                                                                | mrc1 gRNA expression plasmid      |
| KT2171 | mrc1-gRNA-Rv          | AAACAGCGCTTCTCAACTCACAAT                                                                                | mrc1 gRNA expression plasmid      |
| KT27   | mrc1-LFW              | AGAGGATCTAACTGGAG                                                                                       | mrc1 amplification for colony PCR |
| KT90   | mrc1-MR               | GGCTGCAGGTGCCATTGAAGCTACCTCGCC                                                                          | mrc1 amplification for colony PCR |
| KT2168 | mrc1-S604A-donor-Fw   | GTTCAAAACAGTCAACCAAGCGCTGCTCAACTCACAATCGTCGACGCT                                                        | mrc1 mutagenesis oligomer         |
| KT2169 | mrc1-S604A-donor-Rv   | AGCGTCGACGATTGTGAGTTGAGCAGCGCTTGGTTGACTGTTTTGAAC                                                        | mrc1 mutagenesis oligomer         |
| KT2047 | stn1-N-gRNA-Fw        | CACCTTCATTTTCTAGCATTTATT                                                                                | stn1 gRNA expression plasmid      |
| KT2048 | stn1-N-gRNA-Rv        | AAACAATAAATGCTAGAAAATGAA                                                                                | stn1 gRNA expression plasmid      |
| KT2049 | stn1-N-Fw             | CGCGCACTCAGGAAGATGAAGAC                                                                                 | stn1 amplification for colony PCR |
| KT2050 | stn1-N-Rv             | GAGCACTTACGCTGTAAATGTGGA                                                                                | stn1 amplification for colony PCR |
| KT2133 | stn1-2Flag-Fw         | AGTCTTTAAGGGAATGACCTAATATGGACTACAAGGACGACGATGACAAG<br>-GATTACAAAGATGACGACGATAAGATGCTAGAAAATGAAAATCAACTA | stn1 Flag tagging oligomer        |

|        |                   |                                                                                                          |                                   |
|--------|-------------------|----------------------------------------------------------------------------------------------------------|-----------------------------------|
| KT2197 | stn1-2Flag-Rv     | TAGTTGATTTTCATTTTCTAGCATCTTATCGTCGTCATCTTTGTAATCCTT<br>-GTCATCGTCGTCCTTGTAGTCCATATTAGGTCATTCCCT TAAAGACT | stn1 Flag tagging oligomer        |
| KT2123 | reb1-gRNA-Fw      | CACCCTTCAAAAATATAATCTTTA                                                                                 | reb1 gRNA expression plasmid      |
| KT2124 | reb1-gRNA-Rv      | AAACTAAAGATTATATTTTTGAAG                                                                                 | reb1 gRNA expression plasmid      |
| KT2125 | reb1-N-Fw         | CGTTGTACTACTTAGCATTGCC                                                                                   | reb1 amplification for colony PCR |
| KT2126 | reb1-N-Rv         | GGCGCTCGAATCCACATTATC                                                                                    | reb1 amplification for colony PCR |
| KT2127 | reb1-GFP-Fw       | TTATAGTACTTCAAAAATATAATCTATGAGTAAAGGAGAAGAAGACTTTTC                                                      | reb1 GFP tagging oligomer         |
| KT2179 | reb1-GFP-Rv       | CGGATTTAATACGGAGGTATCCATTTTGTATAGTTCATCCATGCCATG                                                         | reb1 GFP tagging oligomer         |
| KT2284 | adh1-promoter-Fw  | GACTCTAGAGGATCAGGCCCTACAACAATAAGAAAATGGC                                                                 | adh1p-Cas9 expression plasmid     |
| KT2285 | adh1-promoter-Rv  | CTTATAGTCCATTTCGAAATTCTCTTGCTTAAAGAAAAGCG                                                                | adh1p-Cas9 expression plasmid     |
| KT2286 | nmt41-deletion-Fw | TCGAATGGACTATAAGGACCACGA                                                                                 | adh1p-Cas9 expression plasmid     |
| KT2287 | nmt41-deletion-Rv | CTGATCCTCTAGAGTCGATCGACC                                                                                 | adh1p-Cas9 expression plasmid     |

---
