# Supplementary material
Source: publisher figshare collection journal article supplement (https://gsajournals.figshare.com/articles/dataset/_/7685642)
Supplement: Supplementary file 3 [file 3]

**Table S2. Plasmids used in this study**

| <b>Name</b>         | <b>Description</b>                                                                        |                            |
|---------------------|-------------------------------------------------------------------------------------------|----------------------------|
| pMZ283              | gRNA expression plasmid, Addgene (#52224)                                                 | Jacob <i>et al.</i> , 2014 |
| pMZ284              | ade6 gRNA expression plasmid, Addgene (#52225)                                            | Jacob <i>et al.</i> , 2014 |
| pSpCas9(BB)-2A-Puro | Cas9 expression plasmid, Addgene (#62988)                                                 | Ran <i>et al.</i> , 2014   |
| pREP1               | <i>nmt1</i> promoter plasmid ( <i>LEU2</i> marker)                                        | Maundrell, 1993            |
| pSLF173             | <i>nmt1</i> promoter plasmid ( <i>ura4<sup>+</sup></i> marker)                            | Forsburg & Sherman, 1997   |
| pSLF273             | <i>nmt41</i> promoter plasmid ( <i>ura4<sup>+</sup></i> marker)                           | Forsburg & Sherman, 1997   |
| pAH233              | gRNA expression plasmid ( <i>LEU2</i> marker)                                             | this study                 |
| pAH234              | <i>ade6</i> gRNA expression plasmid (pRE-pMZ284)                                          | this study                 |
| pAH235              | <i>SpCas9</i> expression plasmid ( <i>nmt41</i> promoter)                                 | this study                 |
| pAH236              | gRNA+ <i>SpCas9</i> expression plasmid ( <i>nmt1</i> promoter, <i>LEU2</i> )              | this study                 |
| pAH237              | gRNA+ <i>SpCas9</i> expression plasmid ( <i>nmt41</i> promoter, <i>LEU2</i> )             | this study                 |
| pAH242              | gRNA+ <i>SpCas9</i> expression plasmid ( <i>nmt1</i> promoter, <i>ura4<sup>+</sup></i> )  | this study                 |
| pAH243              | gRNA+ <i>SpCas9</i> expression plasmid ( <i>nmt41</i> promoter, <i>ura4<sup>+</sup></i> ) | this study                 |
| pAH244              | <i>ade6</i> gRNA expression plasmid derived from pAH233                                   | this study                 |
| pAH246              | <i>swi6</i> gRNA expression plasmid #2 derived from pAH233                                | this study                 |
| pAH249              | <i>swi6</i> gRNA expression plasmid #5 derived from pAH233                                | this study                 |
| pAH250              | <i>stn1</i> gRNA expression plasmid derived from pAH233                                   | this study                 |
| pAH251              | <i>ade6</i> gRNA expression plasmid derived from pAH237                                   | this study                 |
| pAH256              | <i>reb1</i> gRNA expression plasmid derived from pAH233                                   | this study                 |
| pAH259              | <i>ade6</i> gRNA expression plasmid derived from pAH243                                   | this study                 |
| pAH260              | <i>mrc1</i> gRNA expression plasmid derived from pAH233                                   | this study                 |
| pAH261              | <i>SpCas9</i> expression plasmid ( <i>adh1</i> promoter, <i>ura4<sup>+</sup></i> )        | this study                 |
| pAH262              | <i>mrc1</i> gRNA expression plasmid derived from pAH237                                   | this study                 |

|                        |                                                         |                             |
|------------------------|---------------------------------------------------------|-----------------------------|
| pAH263                 | <i>mrc1</i> gRNA expression plasmid derived from pAH243 | this study                  |
| pKT2150                | <i>swi6-W104A</i> gene                                  | this study                  |
| pFA6a-GFP(S65T)-kanMX6 | GFP tagging at C terminus plasmid                       | Bähler <i>et al.</i> , 1998 |

---
