# Supplementary material
Source: publisher figshare collection journal article supplement (https://gsajournals.figshare.com/articles/dataset/_/7685642)
Supplement: Supplementary file 4 [file 3]

**Figure S3. Immunoblot analysis of the Cas9 protein expressed by the *nmt1*- and *nmt41* promoter.**
