# Supplementary material
Source: publisher figshare collection journal article supplement (https://gsajournals.figshare.com/articles/dataset/_/7685642)
Supplement: Supplementary file 6 [file 3]

**Table S4. Mutations introduced by the CRISPR/Cas9 system**

| gRNA        | donor | # | mutation       |
|-------------|-------|---|----------------|
| <i>ade6</i> | no    | 1 | 1 bp insertion |
|             |       | 2 | 2 bp deletion  |
|             |       | 3 | 2 bp deletion  |
|             |       | 4 | 1 bp insertion |
|             |       | 5 | 2 bp deletion  |
|             |       | 6 | 2 bp deletion  |
|             |       | 7 | 2 bp deletion  |
|             |       | 8 | 3 bp deletion  |

| gRNA        | donor                 | #  | mutation                                                | <i>W104A</i> mutation freq.  |
|-------------|-----------------------|----|---------------------------------------------------------|------------------------------|
| <i>swi6</i> | oligo 15 ds<br>gRNA#2 | 1  | 1 bp deletion                                           |                              |
|             |                       | 2  | mixture of two unknown<br>insertions (100~ bp, 200~ bp) |                              |
|             |                       | 3  | 5 bp deletion                                           |                              |
|             |                       | 4  | 8 bp deletion                                           |                              |
|             |                       | 5  | <i>W104</i> mutation                                    | 1/10 (10 %)                  |
|             |                       | 6  | 16 bp deletion                                          | TBZ sensitivity 46 % (19/49) |
|             |                       | 7  | 1 bp insertion                                          |                              |
|             |                       | 8  | 141 bp insertion (salmon DNA)* <sup>1</sup>             |                              |
|             |                       | 9  | 1 bp insertion                                          |                              |
|             |                       | 10 | 1 bp deletion                                           |                              |

| gRNA        | donor                  | # | mutation                                                  | <i>W104A</i> mutation freq.  |
|-------------|------------------------|---|-----------------------------------------------------------|------------------------------|
| <i>swi6</i> | oligo 20 Fw<br>gRNA #2 | 1 | <i>W104A</i> mutation                                     |                              |
|             |                        | 2 | 199 bp insertion (salmon DNA)* <sup>2</sup>               |                              |
|             |                        | 4 | <i>W104A</i> mutation                                     |                              |
|             |                        | 5 | <i>W104A</i> mutation                                     | 4/8 (50 %)                   |
|             |                        | 6 | 1 bp deletion                                             | TBZ sensitivity 50 % (14/24) |
|             |                        | 7 | 1 bp deletion                                             |                              |
|             |                        | 8 | 62 bp insertion (no significant similarity)* <sup>3</sup> |                              |
|             |                        | 9 | <i>W104A</i> mutation                                     |                              |

| gRNA                   | donor           | #  | mutation                                    | <i>W104A</i> mutation freq.  |
|------------------------|-----------------|----|---------------------------------------------|------------------------------|
| <i>swi6</i><br>gRNA #2 | oligo 20 Rv     | 1  | 1 bp deletion                               |                              |
|                        |                 | 2  | <i>W104A</i> mutation + 1 bp deletion       |                              |
|                        |                 | 3  | <i>W104A</i> mutation                       |                              |
|                        |                 | 4  | <i>W104A</i> mutation                       |                              |
|                        |                 | 5  | 73 bp insertion* <sup>4</sup>               | 5/10 (50 %)                  |
|                        |                 | 6  | <i>W104A</i> mutation                       | TBZ sensitivity 63 % (20/32) |
|                        |                 | 7  | 5 bp deletion                               |                              |
|                        |                 | 8  | 1 bp deletion                               |                              |
|                        |                 | 9  | <i>W104A</i> mutation                       |                              |
|                        |                 | 10 | <i>W104A</i> mutation                       |                              |
|                        | oligo 20 Fw +Rv | 1  | <i>W104A</i> mutation                       |                              |
|                        |                 | 2  | 5 bp deletion                               |                              |
|                        |                 | 3  | 5 bp deletion                               |                              |
|                        |                 | 4  | <i>W104A</i> mutation                       |                              |
|                        |                 | 5  | <i>W104A</i> mutation                       |                              |
|                        |                 | 6  | 6 bp deletion                               | 8/14 (57 %)                  |
|                        |                 | 7  | <i>W104A</i> mutation                       | TBZ sensitivity 68% (27/40)  |
|                        |                 | 8  | <i>W104A</i> mutation                       |                              |
|                        |                 | 9  | <i>W104A</i> mutation                       |                              |
|                        |                 | 10 | <i>W104A</i> mutation                       |                              |
|                        |                 | 11 | 5 bp deletion                               |                              |
|                        |                 | 12 | 1 bp deletion                               |                              |
|                        |                 | 13 | mixture of <i>wt</i> and ~1000 bp insertion |                              |
|                        |                 | 14 | <i>W104A</i> mutation                       |                              |
|                        | oligo 20 ds     | 1  | <i>W104A</i> mutation                       |                              |
|                        |                 | 2  | <i>W104A</i> mutation                       |                              |
|                        |                 | 3  | <i>W104A</i> mutation                       |                              |
|                        |                 | 4  | 2 bp deletion                               |                              |
|                        |                 | 5  | <i>W104A</i> mutation + 1 bp deletion       | 7/10 (70 %)                  |
|                        |                 | 6  | 8 bp deletion                               | TBZ sensitivity 56 % (27/48) |
|                        |                 | 7  | <i>W104A</i> mutation                       |                              |
|                        |                 | 8  | <i>W104A</i> mutation                       |                              |
|                        |                 | 9  | <i>W104A</i> mutation                       |                              |
|                        |                 | 10 | <i>W104A</i> mutation                       |                              |

| gRNA                  | donor            | #  | mutation                                   | <i>W104A</i> mutation freq.  |
|-----------------------|------------------|----|--------------------------------------------|------------------------------|
| <i>swi6</i><br>gRNA#2 | oligo 25 Fw      | 1  | <i>W104A</i> mutation                      |                              |
|                       |                  | 2  | <i>W104A</i> mutation                      |                              |
|                       |                  | 3  | <i>W104A</i> mutation                      | 5/7 (71 %)                   |
|                       |                  | 4  | <i>W104A</i> mutation                      | TBZ sensitivity 54 % (13/24) |
|                       |                  | 5  | <i>W104A</i> mutation                      |                              |
|                       |                  | 6  | 1 bp insertion                             |                              |
|                       |                  | 7  | 1 bp deletion                              |                              |
|                       | oligo 25 Rv      | 1  | 132 bp insertion* <sup>5</sup>             |                              |
|                       |                  | 2  | <i>W104A</i> mutation                      |                              |
|                       |                  | 3  | 1 bp insertion                             |                              |
|                       |                  | 4  | 11 bp deletion                             | 4/8 (50 %)                   |
|                       |                  | 5  | <i>W104A</i> mutation                      | TBZ sensitivity 58 % (14/24) |
|                       |                  | 6  | 6 bp deletion                              |                              |
|                       |                  | 7  | <i>W104A</i> mutation                      |                              |
|                       |                  | 8  | <i>W104A</i> mutation                      |                              |
|                       | oligo 25 Fw + Rv | 1  | <i>W104A</i> mutation                      |                              |
|                       |                  | 2  | <i>W104A</i> mutation                      |                              |
|                       |                  | 3  | <i>W104A</i> mutation                      |                              |
|                       |                  | 4  | <i>W104A</i> mutation                      | 8/9 (89 %)                   |
|                       |                  | 7  | mixture of <i>wt</i> and ~200 bp insertion |                              |
|                       |                  | 8  | <i>W104A</i> mutation                      | TBZ sensitivity 50 % (12/24) |
|                       |                  | 9  | <i>W104A</i> mutation                      |                              |
|                       |                  | 10 | <i>W104A</i> mutation                      |                              |
|                       |                  | 11 | <i>W104A</i> mutation                      |                              |
|                       | oligo 25 ds      | 1  | <i>W104A</i> mutation                      |                              |
|                       |                  | 2  | <i>W104A</i> mutation                      |                              |
|                       |                  | 3  | <i>W104A</i> mutation                      |                              |
|                       |                  | 4  | <i>W104A</i> mutation                      | 8/8 (100 %)                  |
|                       |                  | 5  | <i>W104A</i> mutation                      | TBZ sensitivity 38 % (15/40) |
|                       |                  | 6  | <i>W104A</i> mutation                      |                              |
|                       |                  | 7  | <i>W104A</i> mutation                      |                              |
|                       |                  | 8  | <i>W104A</i> mutation                      |                              |

| gRNA        | donor        | #  | mutation                                                           | <i>W104A</i> mutation freq.  |
|-------------|--------------|----|--------------------------------------------------------------------|------------------------------|
| <i>swi6</i> | PCR fragment | 1  | <i>W104A</i> mutation                                              |                              |
| gRNA#2      | 575 bp       | 2  | <i>W104A</i> mutation                                              |                              |
|             |              | 3  | <i>W104A</i> mutation                                              |                              |
|             |              | 4  | <i>W104A</i> mutation                                              |                              |
|             |              | 5  | <i>W104A</i> mutation                                              |                              |
|             |              | 6  | <i>W104A</i> mutation                                              |                              |
|             |              | 7  | <i>W104A</i> mutation                                              | 16/16 (100 %)                |
|             |              | 8  | <i>W104A</i> mutation                                              | TBZ sensitivity 50 % (16/32) |
|             |              | 9  | <i>W104A</i> mutation                                              |                              |
|             |              | 10 | <i>W104A</i> mutation                                              |                              |
|             |              | 11 | <i>W104A</i> mutation                                              |                              |
|             |              | 12 | <i>W104A</i> mutation                                              |                              |
|             |              | 13 | <i>W104A</i> mutation                                              |                              |
|             |              | 14 | <i>W104A</i> mutation                                              |                              |
|             |              | 15 | <i>W104A</i> mutation                                              |                              |
|             |              | 16 | <i>W104A</i> mutation                                              |                              |
| <i>swi6</i> | PCR fragment | 1  | 1 bp deletion                                                      |                              |
| gRNA#5      | 575 bp       | 2  | <i>W104A</i> + 5 bp deletion                                       |                              |
|             |              | 3  | 1 bp deletion                                                      |                              |
|             |              | 4  | 1 bp deletion                                                      |                              |
|             |              | 5  | <i>W104A</i> mutation                                              | 1/14 (7 %)                   |
|             |              | 6  | <i>W104A</i> mutation + 15 bp deletion* <sup>6</sup>               |                              |
|             |              | 7  | 1 bp deletion                                                      | TBZ sensitivity 61 % (22/36) |
|             |              | 8  | <i>W104A</i> mutation + 1 bp deletion                              |                              |
|             |              | 9  | 39 bp deletion                                                     |                              |
|             |              | 10 | 3 bp deletion                                                      |                              |
|             |              | 11 | 1 bp deletion                                                      |                              |
|             |              | 12 | <i>W104A</i> mutation + 191~ bp salmon DNA insertion* <sup>7</sup> |                              |
|             |              | 13 | 13 bp deletion                                                     |                              |
|             |              | 14 | 3 bp deletion                                                      |                              |

| gRNA        | donor            | #  | mutation                                                | <i>S604A</i> mutation freq. |
|-------------|------------------|----|---------------------------------------------------------|-----------------------------|
| <i>mrcI</i> | oligo 25 Fw      | 1  | 2 bp deletion                                           |                             |
|             |                  | 2  | <i>S604A</i> mutation                                   |                             |
|             |                  | 3  | 2 bp deletion                                           |                             |
|             |                  | 4  | <i>S604A</i> mutation                                   |                             |
|             |                  | 5  | <i>S604A</i> mutation                                   | 6/10 (60 %)                 |
|             |                  | 6  | 2 bp deletion                                           | HU sensitivity 23/24 (96 %) |
|             |                  | 7  | 2 bp deletion                                           |                             |
|             |                  | 8  | <i>S604A</i> mutation                                   |                             |
|             |                  | 9  | <i>S604A</i> mutation                                   |                             |
|             |                  | 10 | <i>S604A</i> mutation                                   |                             |
|             | oligo 25 Rv      | 1  | <i>S604A</i> + 1 bp deletion                            |                             |
|             |                  | 2  | 1 bp deletion                                           |                             |
|             |                  | 3  | 2 bp deletion                                           |                             |
|             |                  | 4  | <i>S604A</i> mutation                                   |                             |
|             |                  | 5  | 2 bp deletion                                           | 2/10 (20 %)                 |
|             |                  | 6  | <i>S604A</i> mutation                                   | HU sensitivity 20/24 (83 %) |
|             |                  | 7  | 2 bp deletion                                           |                             |
|             |                  | 8  | 2 bp deletion                                           |                             |
|             |                  | 9  | 2 bp deletion                                           |                             |
|             |                  | 10 | 2 bp deletion                                           |                             |
|             | oligo 25 Fw + Rv | 1  | <i>S604A</i> mutation                                   |                             |
|             |                  | 2  | <i>S604A</i> mutation                                   |                             |
|             |                  | 3  | <i>S604A</i> mutation                                   |                             |
|             |                  | 4  | <i>S604A</i> mutation                                   |                             |
|             |                  | 5  | <i>S604A</i> mutation                                   | 9/10 (90 %)                 |
|             |                  | 6  | <i>S604A</i> mutation                                   | HU sensitivity 23/24 (96 %) |
|             |                  | 7  | <i>S604A</i> mutation + mixture of indels* <sup>8</sup> |                             |
|             |                  | 8  | <i>S604A</i> mutation                                   |                             |
|             |                  | 9  | <i>S604A</i> mutation                                   |                             |
|             |                  | 10 | <i>S604A</i> mutation                                   |                             |
|             | oligo 25 ds      | 1  | <i>S604A</i> mutation                                   |                             |
|             |                  | 2  | <i>S604A</i> mutation                                   |                             |
|             |                  | 3  | <i>S604A</i> mutation                                   |                             |
|             |                  | 4  | <i>S604A</i> mutation                                   |                             |
|             |                  | 5  | <i>S604A</i> mutation                                   | 10/10 (100 %)               |
|             |                  | 6  | <i>S604A</i> mutation                                   | HU sensitivity 20/24 (83 %) |
|             |                  | 7  | <i>S604A</i> mutation                                   |                             |
|             |                  | 8  | <i>S604A</i> mutation                                   |                             |
|             |                  | 9  | <i>S604A</i> mutation                                   |                             |
|             |                  | 10 | <i>S604A</i> mutation                                   |                             |

| gRNA-Cas9                                  | donor       | #  | mutation              | <i>S604A</i> mutation freq. |
|--------------------------------------------|-------------|----|-----------------------|-----------------------------|
| <i>mrc1</i><br>( <i>LEU2</i> )             | oligo 25 ds | 1  | 1 bp deletion         |                             |
|                                            |             | 2  | <i>S604A</i> mutation |                             |
|                                            |             | 3  | <i>S604A</i> mutation |                             |
|                                            |             | 4  | <i>S604A</i> mutation |                             |
|                                            |             | 5  | 2 bp deletion         | 7/10 (70 %)                 |
|                                            |             | 6  | <i>S604A</i> mutation | HU sensitivity 39/46 (85 %) |
|                                            |             | 7  | <i>S604A</i> mutation |                             |
|                                            |             | 8  | <i>S604A</i> mutation |                             |
|                                            |             | 9  | <i>S604A</i> mutation |                             |
|                                            |             | 10 | 2 bp deletion         |                             |
| <i>mrc1</i><br>( <i>ura4<sup>+</sup></i> ) | oligo 25 ds | 1  | <i>S604A</i> mutation |                             |
|                                            |             | 2  | <i>S604A</i> mutation |                             |
|                                            |             | 3  | 2 bp deletion         |                             |
|                                            |             | 4  | 2 bp deletion         |                             |
|                                            |             | 5  | <i>S604A</i> mutation | 8/12 (67 %)                 |
|                                            |             | 6  | <i>S604A</i> mutation | HU sensitivity 46/47 (98 %) |
|                                            |             | 7  | 800~bp insertion      |                             |
|                                            |             | 8  | <i>S604A</i> mutation |                             |
|                                            |             | 9  | <i>S604A</i> mutation |                             |
|                                            |             | 10 | <i>S604A</i> mutation |                             |
|                                            |             | 11 | <i>S604A</i> mutation |                             |
|                                            |             | 12 | 1 bp deletion         |                             |

| gRNA        | donor             | #  | mutation                                             | mutation freq. |
|-------------|-------------------|----|------------------------------------------------------|----------------|
| <i>stn1</i> | none              | 1  | wt                                                   | 6/8 (75 %)     |
|             |                   | 2  | wt                                                   |                |
|             |                   | 3  | 2 bp deletion                                        |                |
|             |                   | 4  | 2 bp deletion                                        |                |
|             |                   | 5  | 1 bp deletion                                        |                |
|             |                   | 6  | 3 bp deletion                                        |                |
|             |                   | 7  | 1 bp deletion                                        |                |
|             |                   | 8  | 1 bp deletion                                        |                |
| gRNA        | donor             | #  | insertion                                            | knock-in freq. |
| <i>stn1</i> | oligo 98 bp Fw    | 4  | 101~ bp insertion (salmon DNA)* <sup>9</sup>         | 4/24 (17 %)    |
|             |                   | 13 | 210~ bp insertion                                    |                |
|             |                   | 20 | 460~ bp insertion                                    |                |
|             |                   | 9  | 2 × Flag                                             |                |
|             |                   | 14 | 2 × Flag                                             |                |
|             |                   | 18 | 2 × Flag                                             |                |
|             |                   | 21 | 2 × Flag +1 bp deletion                              |                |
|             |                   | 24 | 2 × Flag                                             |                |
|             | oligo 98 bp Rv    | 2  | 2 × Flag + 8 bp insertion                            | 0/24 (0 %)     |
|             |                   | 24 | 77 bp insertion* <sup>10</sup>                       |                |
|             | oligo 98 bp Fw+Rv | 1  | mixture of two unknown insertions (100~ bp, 200~ bp) | 9/11 (82%)     |
|             |                   | 2  | 3 × Flag* <sup>11</sup>                              |                |
|             |                   | 3  | 2 × Flag* <sup>12</sup>                              |                |
|             |                   | 4  | 2 × Flag + 3 bp and 8 bp deletions* <sup>13</sup>    |                |
|             |                   | 5  | 2 × Flag                                             |                |
|             |                   | 6  | 100~ bp insertion                                    |                |
|             |                   | 7  | 2 × Flag + 4 bp exchange* <sup>14</sup>              |                |
|             |                   | 8  | 2 × Flag                                             |                |
|             |                   | 9  | 3 × Flag                                             |                |
|             |                   | 10 | 2 × Flag                                             |                |
|             |                   | 11 | 2 × Flag                                             |                |
|             |                   | 14 | 3 × Flag                                             |                |
|             |                   | 19 | 3 × Flag                                             |                |
|             |                   | 24 | 200~ bp insertion                                    |                |

| gRNA        | donor          | #  | insertion                | knock-in freq. |
|-------------|----------------|----|--------------------------|----------------|
| <i>stn1</i> | oligo 98 bp ds | 1  | 2 × Flag                 | 8/9 (89 %)     |
|             |                | 4  | 400~ bp insertion        |                |
|             |                | 5  | 3 × Flag                 |                |
|             |                | 17 | 2 × Flag                 |                |
|             |                | 18 | 3 × Flag                 |                |
|             |                | 19 | 3 × Flag                 |                |
|             |                | 20 | 2 × Flag                 |                |
|             |                | 21 | 2 × Flag                 |                |
|             |                | 22 | 2 × Flag + 1 bp deletion |                |
|             |                | 24 | 2 × Flag                 |                |

| gRNA        | donor | # | mutation      | mutation freq. |
|-------------|-------|---|---------------|----------------|
| <i>reb1</i> | none  | 1 | 2 bp deletion | 6/8 (75%)      |
|             |       | 2 | <i>wt</i>     |                |
|             |       | 3 | 2 bp deletion |                |
|             |       | 4 | 1 bp deletion |                |
|             |       | 5 | <i>wt</i>     |                |
|             |       | 6 | 1 bp deletion |                |
|             |       | 7 | 1 bp deletion |                |
|             |       | 8 | 1 bp deletion |                |



(g)GTGAACAGGGAGTACAGGAGAGGGCTCAGAACGCACCCTTGTTGGGGCCCCAGTGTTGAGGATCAGCGGGG  
AGGAGATGTTGTTGCCACCTCACCACTGGGGGCGCCCGTCAGGAAGTCCAGTACCCAGTTGCACAGGGC  
GGGGTCGAGACCCAGGGTCTCTCTCTCTCTCTCTCTCTCTCTCT~

*mrc1* knock-in

\*<sup>8</sup> mixtures of the *mrc1-S604A* + insertion/deletion at the position near the 3' of the *mrc1-S604A* donor oligonucleotides

1. 3 bp deletion

5'-GTTCAAAACAGTCAACCAAGCGCTGCTCAACTCACAATCGTCGACGCTACATA---TCAACCTC~ -3'

2. insertion of the *mrc1-S604A* donor oligonucleotides (2 bp deletions)

5'-GTTCAAAACAGTCAACCAAGCGCTGCTCAACTCACAATCGTCGACGCT ↓ GTTCA--CAGTCAAC~ -3'

*stn1* knock-in

*stn1*<sup>+</sup> wt 5'-GGGAATGACCCTAAT ↓ AAATGCTAGAAAATGAAAATCAACTAACG-3'

\*<sup>9</sup> *stn1* 5'-----AATGCTAGAAAATGAAAATCAACTAACG-3'

101~ bp insertion (Partial sequence (black letter) has similarity with salmon DNA)

~GGAATAGACCTAATTGGACAAATGTCAACTATTTTAAACCATGAAAATACAGTTATAAACAGTTTTCCATAAAC  
AAGGTCTAAAAACGTGTTTCGATGCAAA

\*<sup>10</sup> *stn1*<sup>+</sup> 5'-GGGAATGACCCTAAT ↓ AAATGCTAGAAAATGAAAATCAACTAACG-3'

74 bp insertion (no significant similarity sequence)

CGTGATATTTTAAACAGTCCATAAAGCACTCAGGACGGCCCTGACAGAGAGAGGGCCGTAGTAGGGTGCTTCC  
A

\*<sup>11</sup> *stn1*<sup>+</sup> 5'-GGGAATGACCCTAAT ↓ - - ATGCTAGAAAATGAAAATCAACTAACG-3'

3 × Flag insertions (1 × Flag insertion (+ 3 bp (GAC(Asp) : grey letter)) between 2 × Flag sequences)

ATGGACTACAAGGACGACGATGACAAGGATTACAAAGATGACGACGATGACAAGGATTACAAAGATGACGAC  
GATAAG

\*<sup>12</sup> *stn1*<sup>+</sup> 5'-GGGAATGACCCTAAT ↓ - - ATGCTAGAAAATGAAAATCAACTAACG-3'

2 × Flag insertion (donor DNA)

ATGGACTACAAGGACGACGATGACAAGGATTACAAAGATGACGACGATAAG

\*<sup>13</sup> *stn1*<sup>+</sup> 5'-GGGAATGACCCTAAT ↓ - - - - CTAGAAAATGAAAATCAACTAACG-3'

2 × Flag insertion + 3 bp deletion and 8 bp deletions near the 5' of the *stn1*<sup>+</sup>

ATGGACTACAAGGACGACGATGACAAGGATTACAAAGAT - - - GACG - - - - -

\*<sup>14</sup> *stn1*<sup>+</sup> 5'-GGGAATGACCCTAAT ↓ - - ATGCTctagAATGAAAATCAACTAACG-3'

2 × Flag insertion + 4 bp in-frame exchange (small letter) in the *stn1*<sup>+</sup>

ATGGACTACAAGGACGACGATGACAAGGATTACAAAGATGACGACGATAAG

underline: PAM, ↓ : cleavage site, - : deletion, underline: short-homology at the junction of the insertion, shadow: introduced point mutations, underline: first ATG, dot-lines: Flag sequences
