# Supplementary material
Source: publisher figshare collection journal article supplement (https://gsajournals.figshare.com/articles/dataset/_/7685642)
Supplement: Supplementary file 7 [file 3]

**Table S1. Strains used in this study**

| <b>Name</b> | <b>Genotype</b>                                               |            |
|-------------|---------------------------------------------------------------|------------|
| PR109       | <i>h<sup>-</sup> leu1-32 ura4-D18</i>                         | lab strain |
| AHY740      | <i>h<sup>-</sup> leu1-32 ura4-D18 swi6-W104A</i>              | this study |
| AHY743      | <i>h<sup>-</sup> leu1-32 ura4-D18 mrc1-S604A</i>              | this study |
| AHY739      | <i>h<sup>-</sup> leu1-32 ura4-D18 2xFlag-stn1<sup>+</sup></i> | this study |
| AHY741      | <i>h<sup>-</sup> leu1-32 ura4-D18 GFP-reb1<sup>+</sup></i>    | this study |
